# Supplementary material
Source: publisher figshare collection journal article supplement (https://karger.figshare.com/articles/dataset/_/5122693)
Supplement: Supplementary file 1 [file 1]

## Tables

| <b>Parameter</b><br><b>section A</b> | <b>Bacterial Meningitis</b><br><b>(n=33)</b>                                   | <b>Viral Meningitis</b><br><b>(n=19)</b> | <b>p</b><br><b>(univariate)</b> | <b>p</b><br><b>(multivariate)</b> |
|--------------------------------------|--------------------------------------------------------------------------------|------------------------------------------|---------------------------------|-----------------------------------|
| sCRP [mg/dl]                         | 172.8±120.2<br>161.0 (0.2-481.0)                                               | 5.5±9.9<br>2.7 (0.2-42.5)                | < 0.01                          | 0.07                              |
| Body temperature [°C]                | 38.4<br>38.5 (36.1-40.6)                                                       | 37.7±1.4<br>37.2 (36.3-41.0)             | 0.04                            | 0.20                              |
| Blood Leukocytes [μl]                | 17690±82<br>15700 (3700-42300)                                                 | 9210±2255<br>8900 (5100-14300)           | < 0.01                          | < 0.01                            |
| CSF Leukocytes [μl]                  | 3405±4794<br>980 (105-16210)                                                   | 173±212<br>97 (12-670)                   | < 0.01                          | < 0.01                            |
| CSF Protein [mg/l]                   | 4912±3861<br>3514 (870-18040)                                                  | 820±509<br>628 (399-2480)                | < 0.01                          | < 0.01                            |
| Q <sub>Albumin</sub> × 1E-3          | 90.7±80.4<br>59.3 (10.6-320.0)                                                 | 11.9±7.5<br>9.1 (5.3-37.2)               | < 0.01                          | < 0.01                            |
| CSF Lactate [mmol/l]                 | 12.1±7.4<br>10.5 (2.4-42.3)                                                    | 2.2±0.6<br>2.1 (1.3-3.6)                 | < 0.01                          | 0.16                              |
| CSF Tau [pg/ml]                      | 244.0±528.1<br>60.0 (60.0-2791.0)                                              | 110.0±73.9<br>76.0 (16.7-290.0)          | 0.64                            | -                                 |
| CSF S100B [ng/ml]                    | 14.0±31.4<br>5.2 (0.1-178.4)                                                   | 1.6±0.6<br>1.6 (0.6-3.1)                 | < 0.01                          | 0.03                              |
| <b>Parameter</b><br><b>section B</b> | <b>Bacterial Meningitis</b><br><b>(Borrelia and Tb incl.)</b><br><b>(n=48)</b> | <b>Viral Meningitis</b><br><b>(n=19)</b> | <b>p</b><br><b>(univariate)</b> | <b>p</b><br><b>(multivariate)</b> |
| CSF Leukocytes [μl]                  | 2439±4220                                                                      | 173±212                                  | < 0.01                          | < 0.01                            |

|                                |                                                                                                                               |                                           |                                  |                                    |
|--------------------------------|-------------------------------------------------------------------------------------------------------------------------------|-------------------------------------------|----------------------------------|------------------------------------|
|                                | 602 (1-16210)                                                                                                                 | 97 (12-670)                               |                                  |                                    |
| CSF Protein [mg/l]             | 3756±3649<br>2375 (502-18040)                                                                                                 | 820±509<br>628 (399-2480)                 | < 0.01                           | < 0.01                             |
| QAlbumin x 1-E3                | 66.2±74.4<br>66.2 (6.7-320.0)                                                                                                 | 11.9±7.5<br>9.1 (5.3-37.2)                | < 0.01                           | < 0.01                             |
| CSF Lactate [mmol/l]           | 9.1±7.7<br>8.0 (1.3-42.3)                                                                                                     | 2.2±0.6<br>2.1 (1.3-3.6)                  | < 0.01                           | 0.04                               |
| CSF Tau [pg/ml]                | 229.3±462.6<br>88.0 (60.0-2791.0)                                                                                             | 110.0±73.9<br>76.0 (16.7-290.0)           | 0.33                             | -                                  |
| CSF S100B [ng/ml]              | 10.4±26.5<br>4.1 (0.1-178.4)                                                                                                  | 1.6±0.6<br>1.6 (0.6-3.1)                  | < 0.01                           | 0.03                               |
| <b>Parameter<br/>section C</b> | <b><i>Bacterial Meningitis<br/>(Borrelia and Tb incl.),<br/>all with CSF Leukocyte<br/>counts &lt; 1000/μl<br/>(n=31)</i></b> | <b><i>Viral Meningitis<br/>(n=19)</i></b> | <b><i>p<br/>(univariate)</i></b> | <b><i>p<br/>(multivariate)</i></b> |
| CSF Leukocytes [/μl]           | 362±301<br>332 (1-1000)                                                                                                       | 173±212<br>97 (12-670)                    | < 0.05                           | 0.07                               |
| CSF Protein [mg/l]             | 2890±2850<br>1510 (502-10430)                                                                                                 | 820±509<br>628 (399-2480)                 | < 0.01                           | 0.07                               |
| QAlbumin x 1E-3                | 54.3±72.6<br>31.1 (6.7-320.0)                                                                                                 | 11.9±7.5<br>9.1 (5.3-37.2)                | < 0.01                           | 0.05                               |
| CSF Lactate [mmol/l]           | 7.8±8.4<br>85.0 (1.3-42.3)                                                                                                    | 2.2±0.6<br>2.1 (1.3-3.6)                  | < 0.01                           | 0.11                               |
| CSF Tau [pg/ml]                | 194.3±277.2<br>98.0 (60.0-1395.0)                                                                                             | 110.0±73.9<br>76.0 (16.7-290.0)           | 0.24                             | -                                  |

|                   |                              |                          |        |      |
|-------------------|------------------------------|--------------------------|--------|------|
| CSF S100B [ng/ml] | 10.4±26.5<br>4.1 (0.1-178.4) | 1.6±0.6<br>1.6 (0.6-3.1) | < 0.01 | 0.14 |
|-------------------|------------------------------|--------------------------|--------|------|

**Table 1** Comparison of laboratory parameters between patients with either confirmed bacterial or viral meningitis (section A). Descriptive values are given either as mean ± standard deviation or median (minimum-maximum). The multivariate p-value indicates a group difference independent from the age factor. Section B provides the same parameters as section A but includes Neuroborreliosis and *M. tuberculosis* meningitis patients. Section C contains the data for all groups of patients with bacterial meningitis displaying CSF leukocyte counts <1000/μl in comparison to the viral meningitis group.

| <b>Parameter</b><br><b>section A</b>                                          | <b>Optimal Cut-off</b> | <b>Sensitivity</b><br><b>95%-CI</b> | <b>Specificity</b><br><b>95%-CI</b> | <b>AUC</b><br><b>95%-CI</b> |
|-------------------------------------------------------------------------------|------------------------|-------------------------------------|-------------------------------------|-----------------------------|
| Blood Leukocytes [/μl]                                                        | 10600                  | 85%<br>[68%, 95%]                   | 84%<br>[60%, 97%]                   | 0.85<br>[78%, 97%]          |
| CSF Leukocytes [/μl]                                                          | 285                    | 88%<br>[72%, 97%]                   | 84%<br>[60%, 97%]                   | 0.92<br>[85%, 100%]         |
| CSF Protein [mg/l]                                                            | 1047                   | 97%<br>[84%, 100%]                  | 84%<br>[60%, 97%]                   | 0.96<br>[0.91, 1.00]        |
| Q <sub>Albumin</sub> × 1E-3                                                   | 20.2                   | 88%<br>[72%, 97%]                   | 95%<br>[74%, 100%]                  | 0.89<br>[0.80, 0.94]        |
| CSF S100B [ng/ml]                                                             | 3.1                    | 76%<br>[56%, 89%]                   | 100%<br>[82%, 100%]                 | 0.90<br>[0.82, 0.99]        |
| <b>Patients with BM,<br/>neuroborreliosis or<br/>neurotuberculosis vs. VM</b> | <b>Optimal Cut-off</b> | <b>Sensitivity</b><br><b>95%-CI</b> | <b>Specificity</b><br><b>95%-CI</b> | <b>AUC</b><br><b>95%-CI</b> |

|                                                                                                  |                        |                                     |                                     |                             |
|--------------------------------------------------------------------------------------------------|------------------------|-------------------------------------|-------------------------------------|-----------------------------|
| <b>patients</b>                                                                                  |                        |                                     |                                     |                             |
| <b>section B</b>                                                                                 |                        |                                     |                                     |                             |
| CSF Leukocytes [ $\mu$ l]                                                                        | 285                    | 71%<br>[56%, 83%]                   | 84%<br>[60%, 97%]                   | 0.79<br>[0.68, 0.90]        |
| CSF Protein [mg/l]                                                                               | 1047                   | 79%<br>[65%, 90%]                   | 84%<br>[60%, 97%]                   | 0.88<br>[0.79, 0.96]        |
| QAlbumin x 1E3                                                                                   | 20.2                   | 69%<br>[54%, 81%]                   | 95%<br>[74%, 100%]                  | 0.86<br>[0.77, 0.94]        |
| CSF Lactate [mmol/l]                                                                             | 2.7                    | 75%<br>[60%, 86%]                   | 89%<br>[67%, 99%]                   | 0.83<br>[0.73, 0.93]        |
| CSF S100B [ng/ml]                                                                                | 2                      | 77%<br>[62%, 88%]                   | 84%<br>[60%, 97%]                   | 0.82<br>[0.72, 0.92]        |
| <b>Patients with BM (Borrelia and Tb included with CSF leukocytes &lt;1000/<math>\mu</math>l</b> | <b>Optimal Cut-off</b> | <b>Sensitivity</b><br><b>95%-CI</b> | <b>Specificity</b><br><b>95%-CI</b> | <b>AUC</b><br><b>95%-CI</b> |
| <b>section C</b>                                                                                 |                        |                                     |                                     |                             |
| CSF Leukocytes [ $\mu$ l]                                                                        | 285                    | 55%<br>[36%, 73%]                   | 84%<br>[60%, 97%]                   | 0.67<br>[0.52, 0.83]        |
| CSF Protein [mg/l]                                                                               | 1047                   | 71%<br>[52%, 86%]                   | 84%<br>[60%, 97%]                   | 0.83<br>[0.71, 0.94]        |
| QAlbumin x 1E-3                                                                                  | 20.2                   | 58%<br>[39%, 75%]                   | 95%<br>[74%, 100%]                  | 0.80<br>[0.68, 0.93]        |
| CSF Lactate [mmol/l]                                                                             | 2.7                    | 68%<br>[49%, 83%]                   | 89%<br>[67%, 99%]                   | 0.74<br>[0.60, 0.89]        |
| CSF S100B [ng/ml]                                                                                | 2                      | 71%<br>[52%, 86%]                   | 84%<br>[60%, 97%]                   | 0.80<br>[0.64, 0.90]        |

**Table 2** Classification characteristics for promising parameters to distinguish between bacterial and viral meningitis. Optimal cut-offs, sensitivity and specificity are determined according the Youden criterion. Section A: Bacterial meningitis without *Borrelia* infection and without neurotuberculosis vs. viral meningitis. Section B: Bacterial meningitis with *Borrelia* infection and with neurotuberculosis vs. viral meningitis. Section C: Bacterial meningitis with *Borrelia* infection and with neurotuberculosis with CSF leukocyte counts below 1000/ $\mu$ l vs. viral meningitis.
