# Supplementary material
Source: publisher figshare collection journal article supplement (https://karger.figshare.com/articles/dataset/_/5122693)
Supplement: Supplementary file 2 [file 1]

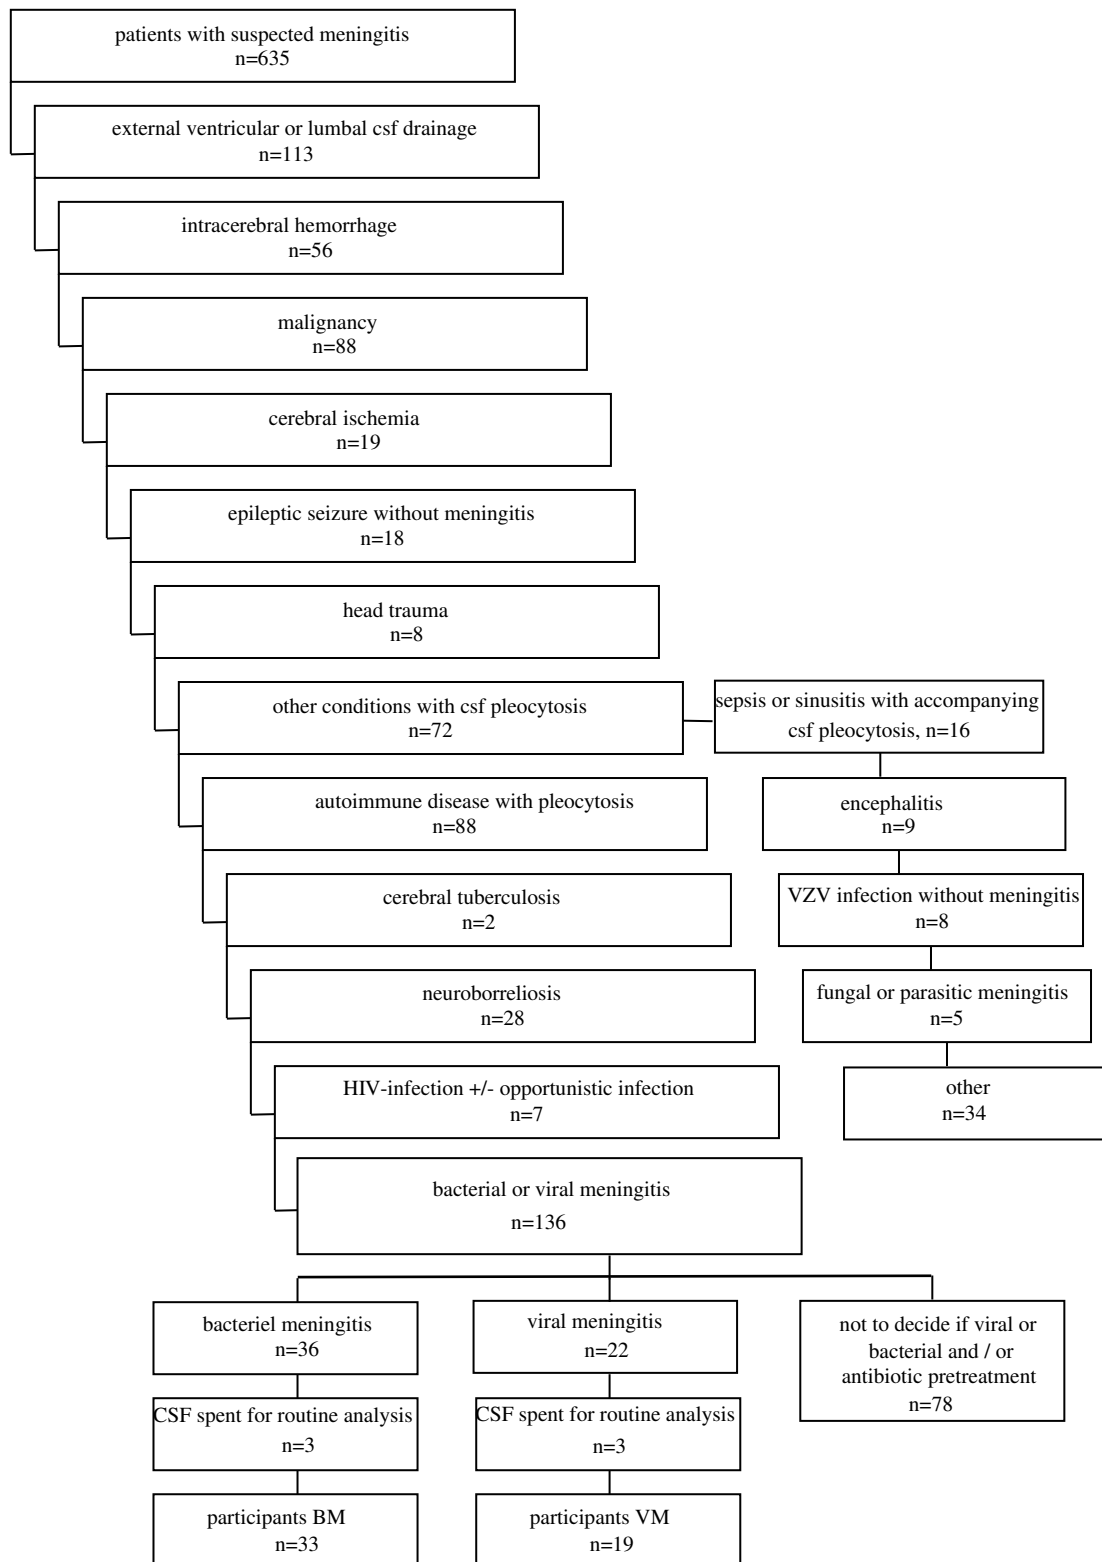

**Figure 1** Flow chart of inclusion and exclusion criteria.

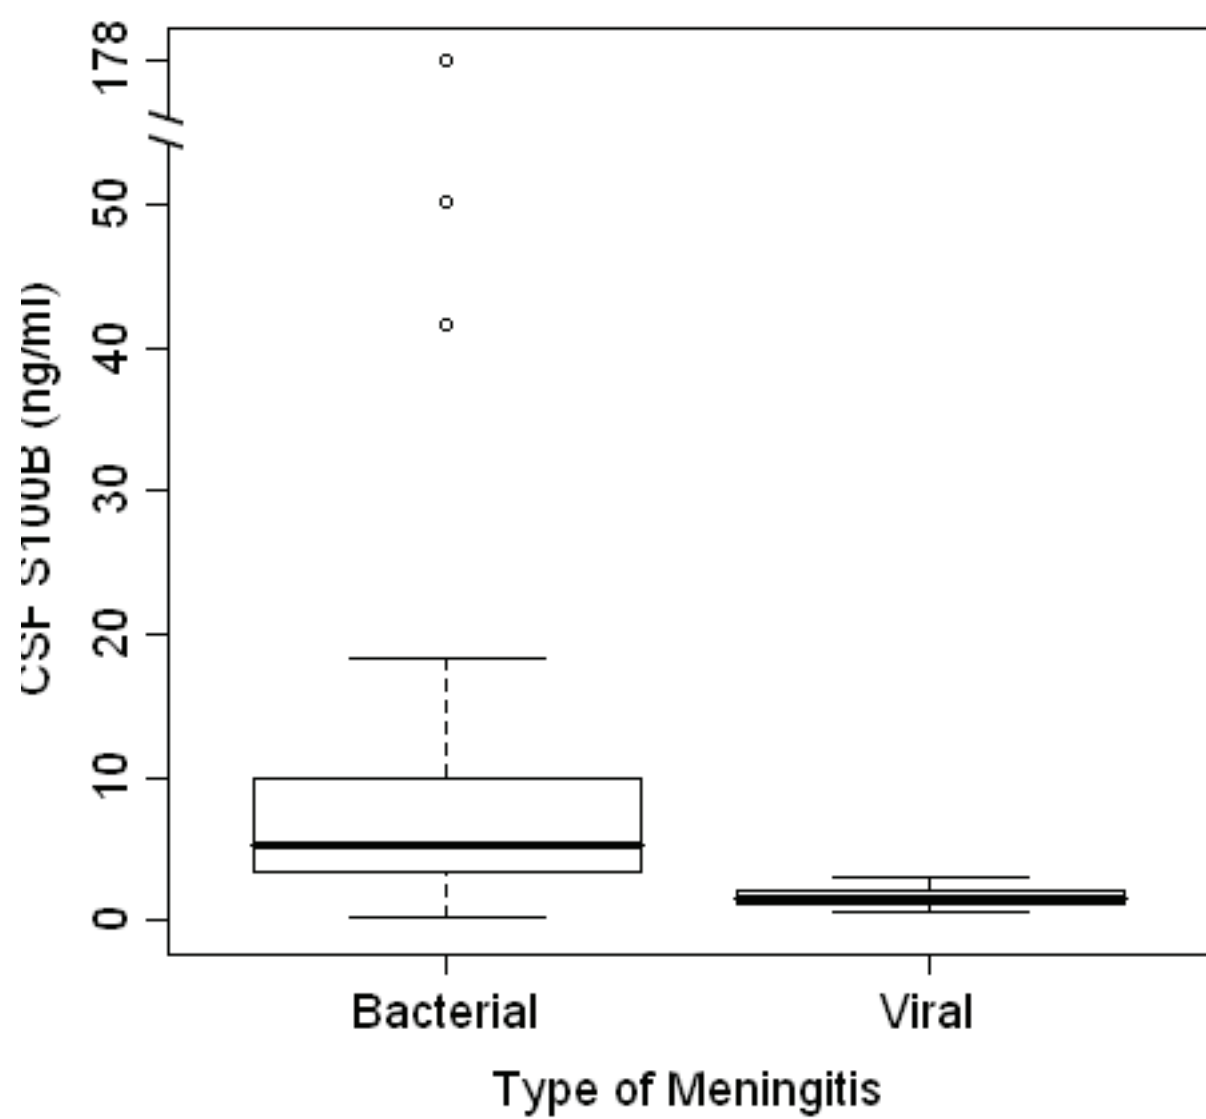

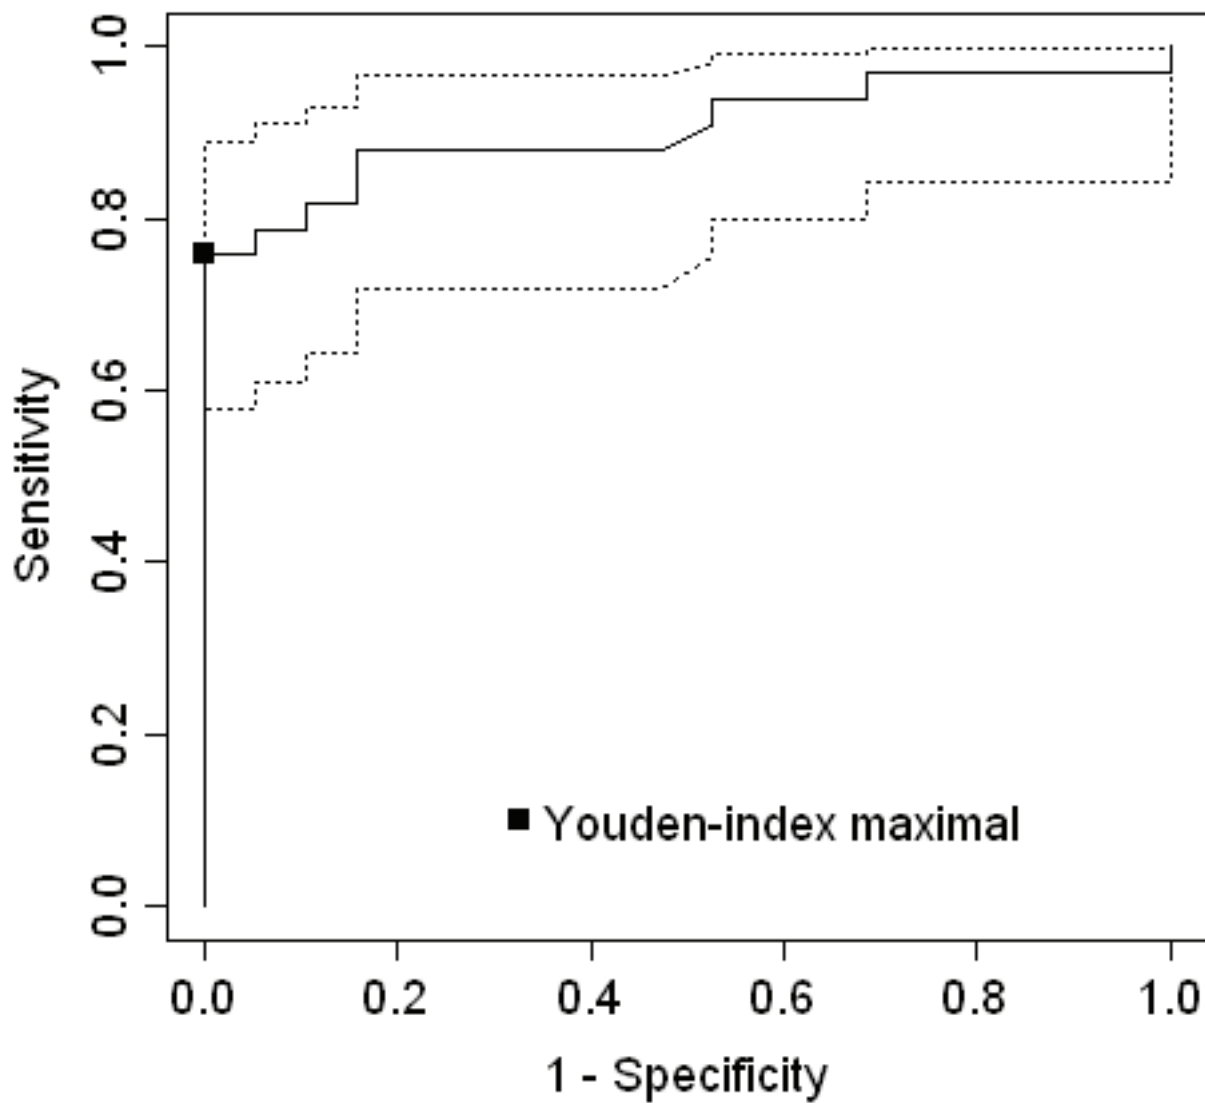

**Figure 2** Up: Distribution of S100B concentration in the cerebrospinal fluid of patients with microbiological proven bacterial or viral meningitis. Down: Receiver Operator Characteristic (ROC) curve, representing sensitivity versus 1-specificity for each possible cut-off.
